# Supplementary material for: Amine vapor responsive lanthanide complex entrapment: control of the ligand-to-metal and metal-to-metal energy transfer
Source: Royal Society of Chemistry journal article supplement (doi:10.1039/c5tc04377h), 2016-01-01
Supplement: c5tc04377h1.pdf [file c5tc04377h1.pdf]

## Supporting Information

### **Amine Vapor Responsive Lanthanide Complex Entrapment: Control of Ligand-to-Metal and Metal-to-Metal Energy Transfer**

*Peng Li, and Huanrong Li\**

*School of Chemical Engineering and Technology, Hebei University of Technology,*

*Guang Rong Dao 8, Hongqiao District, Tianjin 300130, P. R. China.*

E-mail: [lihuanrong@hebut.edu.cn](mailto:lihuanrong@hebut.edu.cn)

## 1. Spectroscopic and time resolved measurements

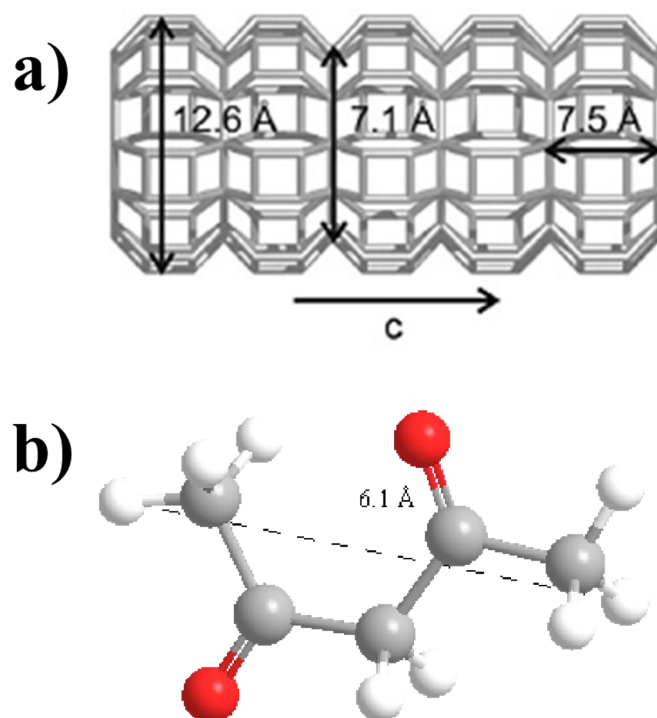

**Figure S1.** a) Schematic representation of ZL framework, b) Molecular structure of acac,

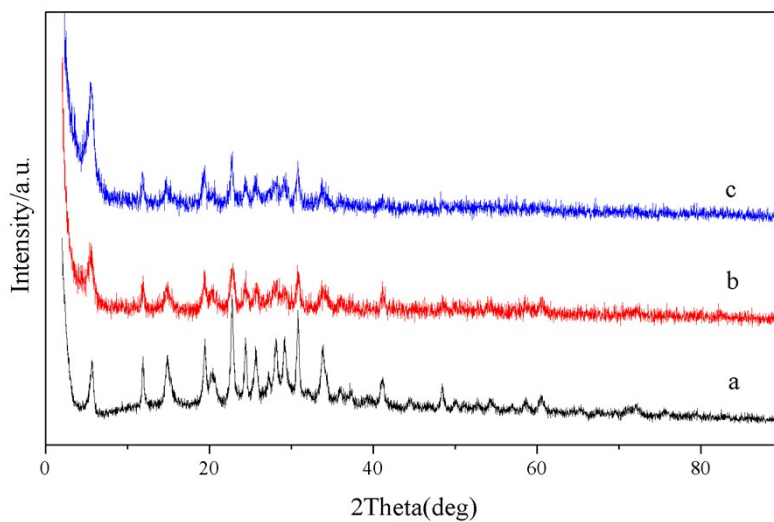

**Figure S2.** XRD pattern of a) nanozeolite (NZL) (black line) and b)  $\text{Eu}_4\text{Tb}_6(\text{acac})_n@ \text{NZL}$  (red line). c)  $\text{Eu}_4\text{Tb}_6(\text{acac})_n@ \text{NZL}$  upon exposure to  $\text{Et}_3\text{N}$ .

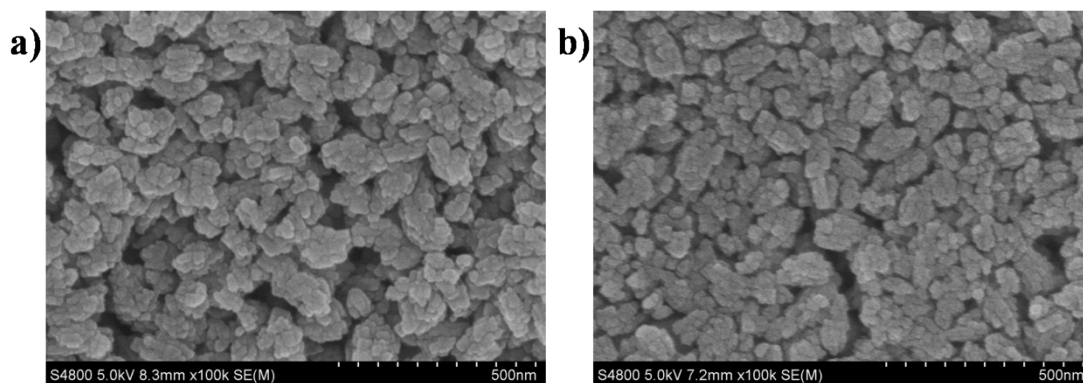

**Figure S3.** SEM images of (a) nanozeolite (NZL) and b)  $\text{Eu}_4\text{Tb}_6(\text{acac})_n@NZL$ .

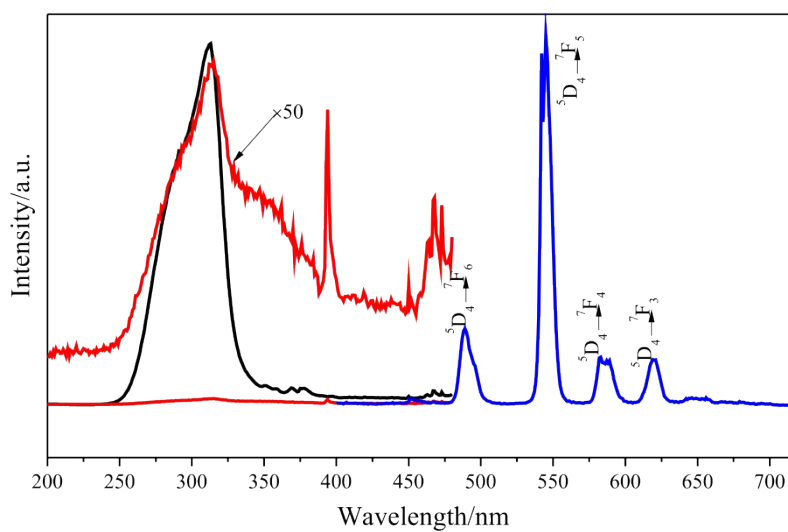

**Figure S4.** Excitation spectra of  $\text{Eu}_4\text{Tb}_6(\text{acac})_n@NZL$  monitored at 544 nm (black line) and monitored at 612 nm (red line), emission spectrum (blue line) of  $\text{Eu}_4\text{Tb}_6(\text{acac})_n@NZL$  excited at 310 nm.

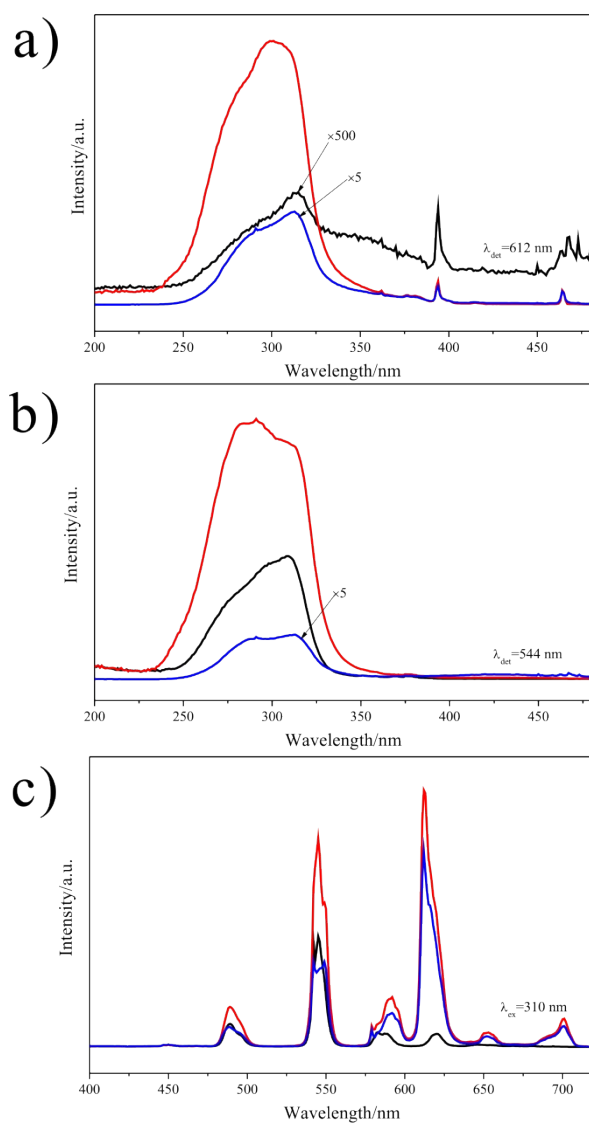

**Figure S5.** Excitation spectra of  $\text{Eu}_4\text{Tb}_6(\text{acac})_n@NZL$  before (black line) and after exposure to  $n\text{-BuNH}_2$  (red line), Benzylamine (blue line), a) monitored at 612 nm, b) monitored at 544 nm; c) Emission spectra of  $\text{Eu}_4\text{Tb}_6(\text{acac})_n@NZL$  before (black line) and after exposure to  $n\text{-BuNH}_2$  (red line), Benzylamine (blue line) excited at 310 nm.

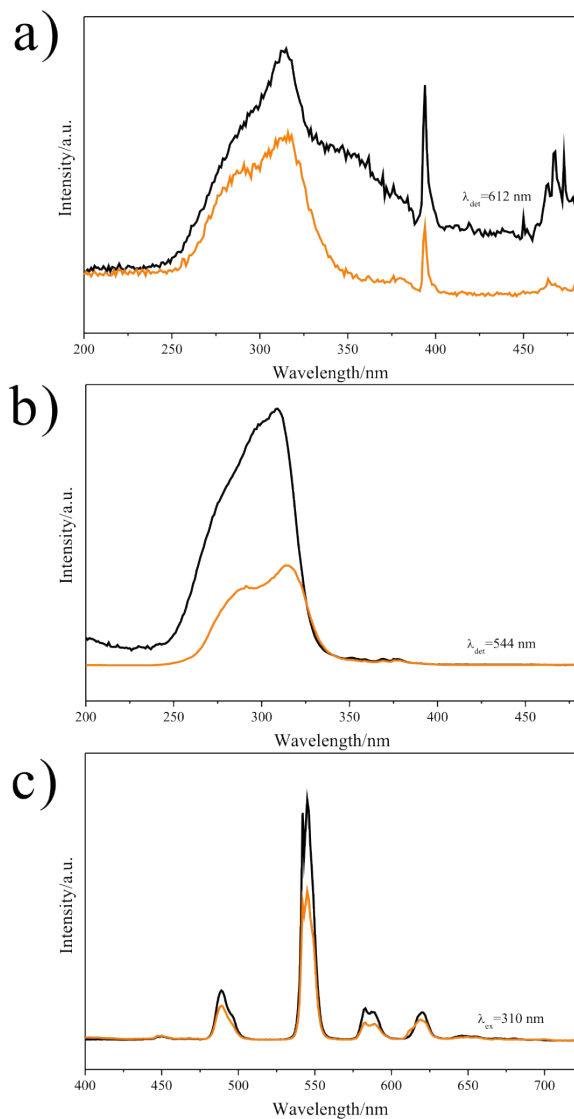

**Figure S6.** Excitation spectra of  $\text{Eu}_4\text{Tb}_6(\text{acac})_n@NZL$  before (black line) and after exposure to N-methylaniline (orange line) a) monitored at 612 nm, b) monitored at 544 nm; c) Emission spectra of  $\text{Eu}_4\text{Tb}_6(\text{acac})_n@NZL$  before (black line) and after exposure to N-methylaniline (orange line) excited at 310 nm.

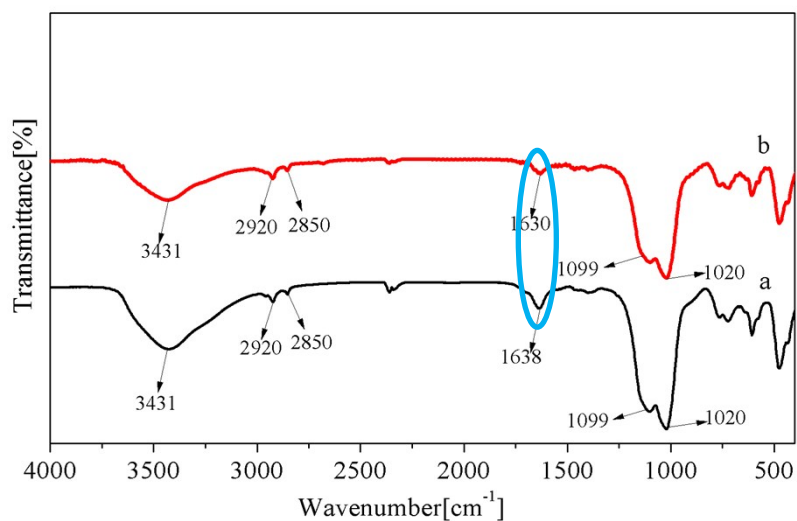

**Figure S7.** FTIR spectra of (a)  $\text{Eu}_4\text{Tb}_6(\text{acac})_n@N\text{ZL}$  (black line), (b)  $\text{Eu}_4\text{Tb}_6(\text{acac})_n@N\text{ZL}$  upon exposure to  $\text{Et}_3\text{N}$  (red line).

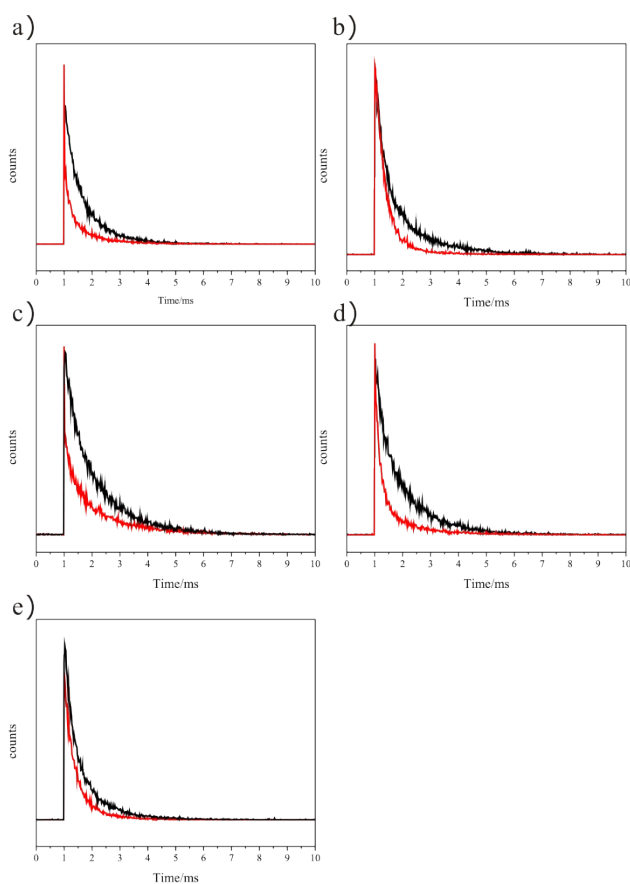

**Figure S8.** The compared decay curves of  $\text{Tb}^{3+}(\text{acac})_n@N\text{ZL}$  (black line) and  $\text{Eu}_4\text{Tb}_6(\text{acac})_n@N\text{ZL}$  (red line) using an excitation of 310 nm and monitored at 544 nm upon exposure to a)  $\text{Et}_3\text{N}$ , b)  $n\text{-BuNH}_2$ , c) Benzylamine, d)  $t\text{-BuNH}_2$  and e) En vapor.

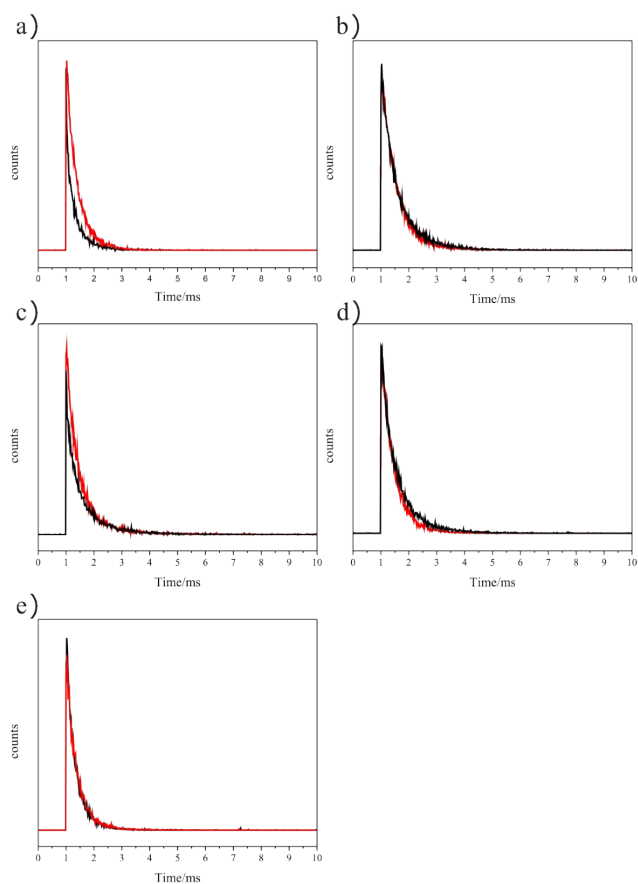

**Figure S9.** The compared decay curves of  $\text{Eu}^{3+}(\text{acac})_n@NZL$  (black line) and  $\text{Eu}_4\text{Tb}_6(\text{acac})_n@NZL$  (red line) using an excitation of 310 nm and monitored at 612 nm upon exposure to a)  $\text{Et}_3\text{N}$ , b)  $n\text{-BuNH}_2$ , c) Benzylamine, d)  $t\text{-BuNH}_2$  and e) En vapor.

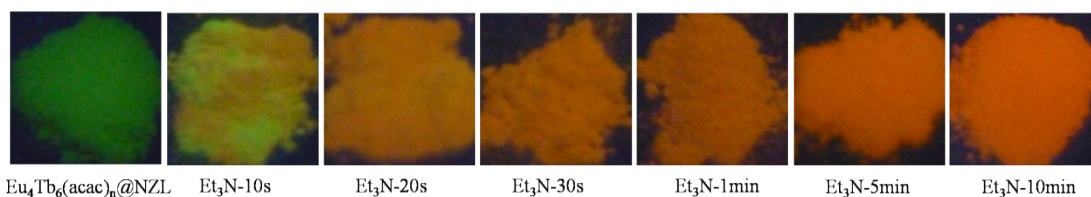

**Figure S10.** Digital photographs of  $\text{Eu}_4\text{Tb}_6(\text{acac})_n@NZL$  upon contact with the equilibrated vapor of  $\text{Et}_3\text{N}$  for varied periods of time under near UV irradiation at 302 nm.

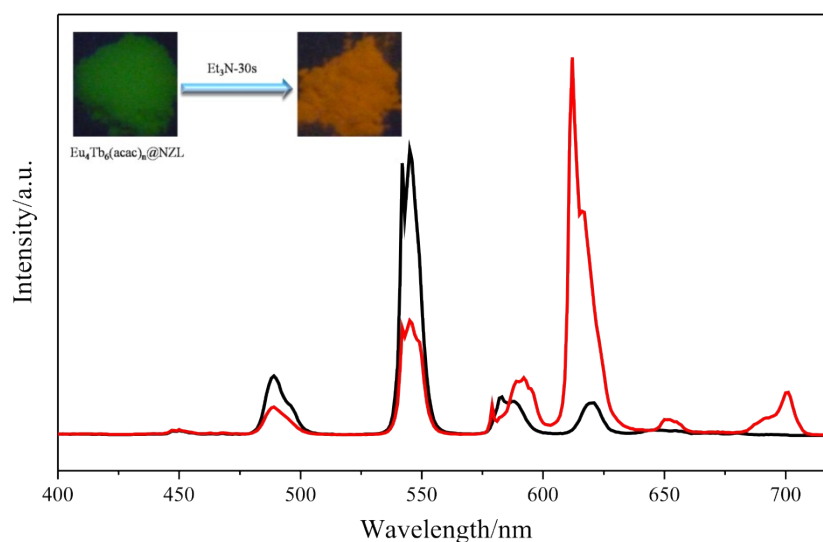

**Figure S11.** Emission spectrum of  $\text{Eu}_4\text{Tb}_6(\text{acac})_n@NZL$  upon contact with the equilibrated vapor of  $\text{Et}_3\text{N}$  for 30 s; Inset: Digital photographs of  $\text{Eu}_4\text{Tb}_6(\text{acac})_n@NZL$  upon contact with the equilibrated vapor of  $\text{Et}_3\text{N}$  for 30 s under near UV irradiation at 302 nm.

**Table S1.** The equilibrated vapor pressure of amine solvents.

|                                  | $\text{Et}_3\text{N}$ | t-BuNH <sub>2</sub> | n-BuNH <sub>2</sub> | En   | Benzylamine | N-methylaniline | aniline |
|----------------------------------|-----------------------|---------------------|---------------------|------|-------------|-----------------|---------|
| Equilibrated vapor pressure(KPa) | 9.06                  | 49.54               | 12.29               | 1.65 | 0.09        | 0.06            | 0.09    |
